# Supplementary material for: Effects of Various Ripening Media on the Mesoporous Structure and Morphology of Hydroxyapatite Powders
Source: MDPI journal article supplement (doi:10.3390/nano13030418), 2023-01-19
Supplement: s1 [file s1]

# Effects of Various Ripening Media on the Mesoporous Structure and Morphology of Hydroxyapatite Powders

Margarita A. Goldberg <sup>1,\*</sup>, Olga S. Antonova <sup>1</sup>, Nadezhda O. Donskaya <sup>1</sup>, Alexander S. Fomin <sup>1</sup>, Fadis F. Murzakhanov <sup>2</sup>, Marat R. Gafurov <sup>2</sup>, Anatoliy A. Konovalov <sup>1</sup>, Artem A. Kotyakov <sup>1</sup>, Alexander V. Leonov <sup>3</sup>, Sergey V. Smirnov <sup>1</sup>, Tatiana O. Obolkina <sup>1</sup>, Egor A. Kudryavtsev <sup>4</sup>, Sergey M. Barinov <sup>1</sup> and Vladimir S. Komlev <sup>1</sup>

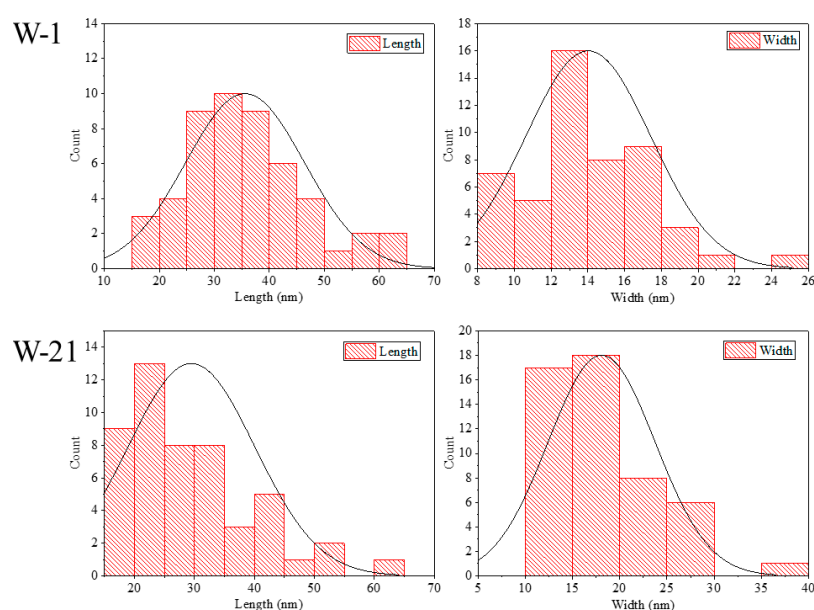

(a)

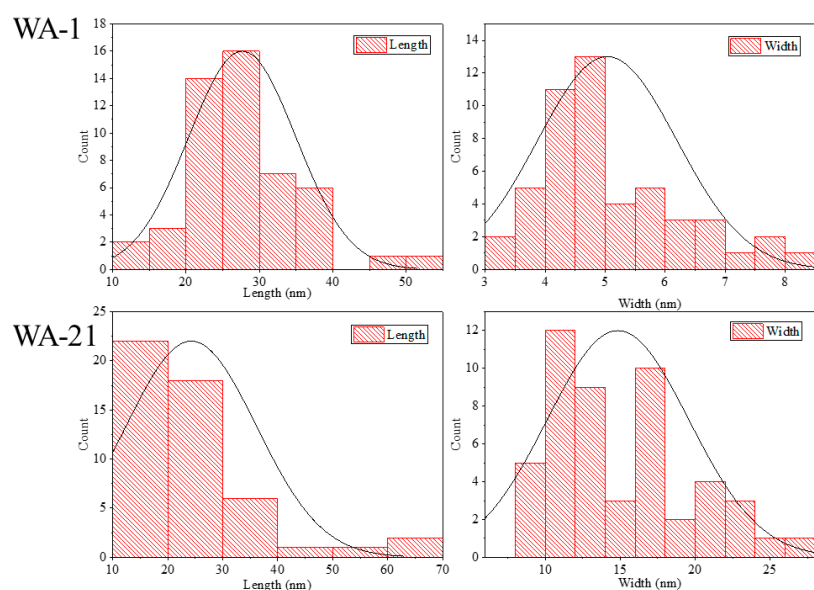

(b)

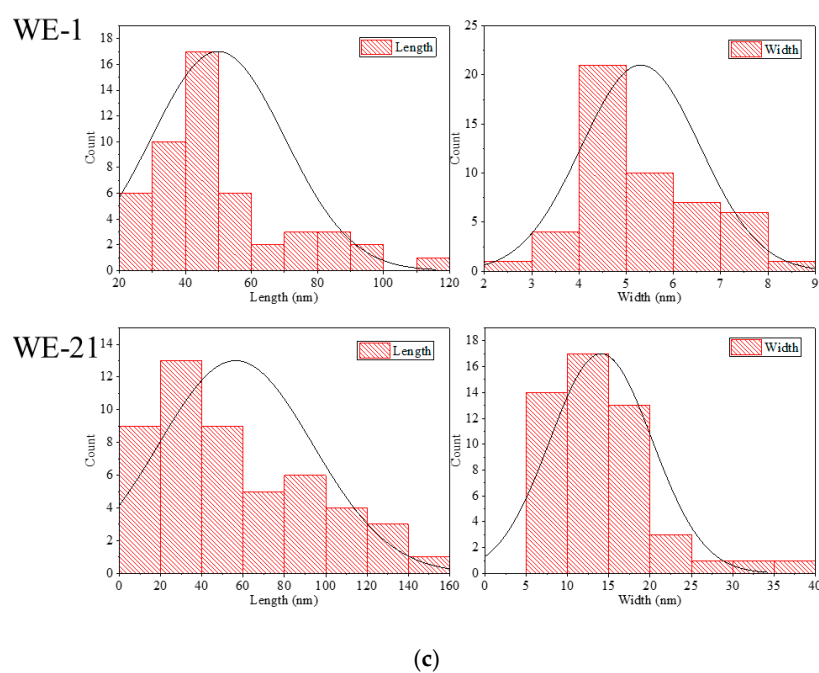

Figure S1. Particle length and width distribution according to TEM data, there (a)- water-synthesized materials, (b) – a water-acetone mixture, (c) – a water-ethanol mixture.
